# Supplementary material
Source: PubMed Central journal article supplement (PMC4160424)

Strain: WT  $\Delta iglE$   
14kDa —   $\alpha VgrG$

Supplement: NIHMS574025-supplement-Supp_Fig_S1.pdf [file NIHMS574025-supplement-Supp_Fig_S1.pdf]

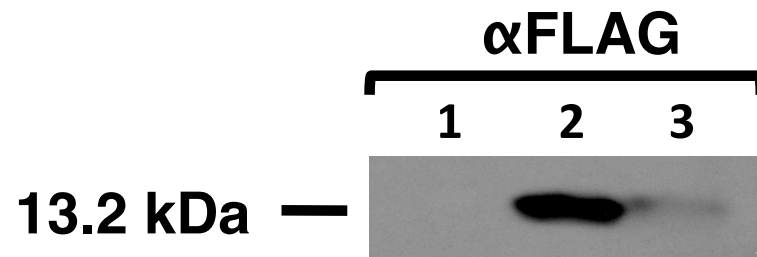

**1:  $\Delta iglE$**

**2:  $\Delta iglE/IgIE$ -FLAG**

**3.  $\Delta iglE/IgIEC22G$ -FLAG**

Supplement: NIHMS574025-supplement-Supp_Fig_S2.pdf [file NIHMS574025-supplement-Supp_Fig_S2.pdf]
